# Supplementary material for: Whole genome sequences of three Clade 3 Clostridium difficile strains carrying binary toxin genes in China
Source: PubMed Central journal article supplement (PMC5337907; doi:10.1038/srep43555), 2017-03-06
Supplement: srep43555-s1.pdf [file srep43555-s1.pdf]

## Supplementary data

### **Whole genome sequences of three Clade 3 *Clostridium difficile* strains carrying binary toxin genes in China**

**Rong Chen<sup>1,2</sup>, Yu Feng<sup>1,2</sup>, Xiaohui Wang<sup>1,2</sup>, Jingyu Yang<sup>1,2</sup>, Xiaoxia Zhang<sup>1,2</sup>,**

**Xiaoju Lü<sup>1,2</sup>, Zhiyong Zong<sup>1,2,3§</sup>**

<sup>1</sup>*Center of Infectious Diseases, West China Hospital, Sichuan University, Chengdu, China.*

<sup>2</sup>*Division of Infectious Diseases, State Key Laboratory of Biotherapy, Chengdu, China.*

<sup>3</sup>*Department of Infection Control, West China Hospital, Sichuan University, Chengdu, China.*

§Corresponding author. Mailing address: Center of Infectious Diseases, West China Hospital (Huaxi), Guoxuexiang 37, Chengdu 610041, China. Phone: 86-28-8542-2637. Fax: 86-28-8542-3212. E-mail: [zongzhiy@scu.edu.cn](mailto:zongzhiy@scu.edu.cn)

Table S1. *C. difficile* plasmids with sequence available in GenBank

| Plasmid name | Strain              | GenBank accession no. |
|--------------|---------------------|-----------------------|
| Unnamed      | BI1                 | FN668943              |
| pCDBI1       | BI1                 | FN668942              |
| pCD6         | CD6                 | NC_005326             |
| Unnamed      | ATCC9689 (DSM 1296) | CP011969              |
| pZJCDC-S82   | ZJCDC-S82           | JYNK01000020          |
| p630         | CD630               | NC_009089             |

Table S2. ANI values (%) between *C. difficile* representative strains.

| Clade     | Strain    | E14<br>(Clade 1) | CD196<br>(Clade 2) | M68<br>(Clade 4) | M120<br>(Clade 5) | CD105KSE08<br>(Clade C-I) |
|-----------|-----------|------------------|--------------------|------------------|-------------------|---------------------------|
| 3         | 103       | 97.71            | 97.88              | 97.59            | 96.31             | 91.24                     |
|           | 106       | 97.77            | 97.82              | 97.58            | 96.33             | 91.43                     |
|           | 133       | 97.68            | 97.86              | 97.48            | 96.32             | 91.28                     |
|           | ZJCDC-S82 | 97.64            | 97.75              | 97.44            | 96.24             | 91.38                     |
|           | CD69      | 97.76            | 97.78              | 97.47            | 96.24             | 91.21                     |
|           | VL-0391   | 97.77            | 97.82              | 97.53            | 96.28             | 91.38                     |
|           | VL-0104   | 97.78            | 97.82              | 97.55            | 96.29             | 91.59                     |
|           | OX561     | 97.81            | 97.78              | 97.41            | 95.98             | 91.26                     |
|           | OX2183    | 97.95            | 97.68              | 97.43            | 96.14             | 91.32                     |
|           | OX1485    | 97.74            | 97.80              | 97.45            | 96.00             | 91.27                     |
|           | OX1232    | 97.65            | 97.83              | 97.44            | 95.98             | 91.23                     |
|           | L058      | 97.83            | 97.81              | 97.42            | 96.14             | 91.30                     |
|           | Q24       | 97.56            | 97.70              | 97.40            | 95.97             | 91.39                     |
|           | 1         | E14              |                    | 98.68            | 97.60             | 95.91                     |
| CD37      |           | 99.05            | 98.71              | 97.71            | 95.63             | 90.97                     |
| P49       |           | 99.20            | 98.80              | 97.72            | 96.00             | 91.04                     |
| E25       |           | 99.06            | 98.69              | 97.52            | 95.76             | 90.84                     |
| E16       |           | 98.76            | 98.50              | 97.41            | 95.65             | 90.92                     |
| P15       |           | 99.10            | 98.68              | 97.64            | 95.89             | 91.09                     |
| P8        |           | 98.89            | 98.65              | 97.45            | 95.83             | 91.05                     |
| T6        |           | 99.53            | 98.77              | 97.63            | 95.66             | 90.84                     |
| P64       |           | 99.51            | 98.69              | 97.55            | 95.66             | 90.97                     |
| 5.3       |           | 99.10            | 98.72              | 97.75            | 96.05             | 90.88                     |
| DA00129   |           | 98.81            | 98.49              | 97.40            | 95.81             | 90.80                     |
| CD8-15    |           | 98.90            | 98.39              | 97.59            | 96.05             | 90.95                     |
| P30       |           | 99.01            | 98.37              | 97.60            | 96.06             | 90.91                     |
| CD200     |           | 98.85            | 98.46              | 97.69            | 95.94             | 90.87                     |
| P38       |           | 99.07            | 98.47              | 97.64            | 96.16             | 90.95                     |
| P7        |           | 99.12            | 98.64              | 97.77            | 95.99             | 90.88                     |
| P29       |           | 99.02            | 98.39              | 97.65            | 95.94             | 91.05                     |
| E12       |           | 99.40            | 98.80              | 97.76            | 96.22             | 90.86                     |
| DA00126   |           | 98.93            | 98.60              | 97.87            | 96.03             | 90.97                     |
| CD45      |           | 99.07            | 98.44              | 97.58            | 96.25             | 90.84                     |
| CD113     |           | 99.04            | 98.46              | 97.69            | 96.11             | 90.94                     |
| ATCC43255 |           | 99.06            | 98.53              | 97.73            | 96.15             | 91.00                     |
| CD22      |           | 99.68            | 98.72              | 97.93            | 96.14             | 90.79                     |
| T17       |           | 99.13            | 98.75              | 97.95            | 96.17             | 91.09                     |
| P11       |           | 99.12            | 98.81              | 97.70            | 95.92             | 91.03                     |
| CD630     |           | 99.13            | 98.64              | 97.78            | 95.48             | 91.10                     |
| T19       | 99.20     | 98.78            | 97.72              | 96.00            | 91.19             |                           |
| P46       | 98.96     | 98.55            | 97.62              | 95.95            | 91.01             |                           |

|     |            |       |       |       |       |       |
|-----|------------|-------|-------|-------|-------|-------|
|     | E7         | 99.20 | 98.77 | 97.75 | 95.77 | 90.85 |
|     | Y343       | 99.07 | 98.73 | 97.70 | 95.88 | 90.93 |
|     | CD105KSE11 | 98.91 | 98.60 | 97.67 | 95.55 | 90.57 |
|     | DA00216    | 99.69 | 98.69 | 97.60 | 95.78 | 90.94 |
|     | DA00211    | 99.12 | 98.54 | 97.53 | 95.91 | 91.15 |
| 2   | CD196      | 98.62 |       | 97.54 | 95.97 | 91.20 |
|     | E19        | 98.59 | 99.56 | 97.51 | 95.83 | 91.15 |
|     | T23        | 98.61 | 99.31 | 97.63 | 95.96 | 90.98 |
|     | E15        | 98.55 | 99.10 | 97.36 | 95.58 | 90.98 |
|     | P59        | 98.56 | 99.16 | 97.50 | 95.84 | 90.88 |
| 4   | M68        | 97.73 | 97.54 |       | 95.77 | 90.99 |
|     | CF5        | 98.05 | 97.91 | 99.64 | 95.98 | 91.00 |
|     | CD002      | 97.80 | 97.79 | 99.29 | 95.58 | 90.97 |
|     | 6503       | 97.49 | 97.41 | 98.56 | 95.70 | 90.95 |
| 5   | M120       | 95.91 | 95.97 | 95.77 |       | 91.03 |
| C-I | CD105KSE08 | 90.94 | 91.20 | 90.99 | 91.03 |       |

---

Table S3. Numbers of SNPs in core genome for each strain using isolate 103 as the reference.

| Strain    | No. of SNP | Strain      | No. of SNP | Strain  | No. of SNP | Strain       | No. of SNP |
|-----------|------------|-------------|------------|---------|------------|--------------|------------|
| CD69      | 1098       | CD45        | 15973      | DA00129 | 16251      | CD34         | 16433      |
| OX2183    | 1146       | ATCC43255   | 16023      | T19     | 16259      | CD37         | 16434      |
| ZJCDD_S82 | 1167       | CD200       | 16064      | T17     | 16273      | 002_P50_2011 | 16485      |
| OX1232    | 1245       | Y343        | 16154      | CD9     | 16290      | CD002        | 16516      |
| 133       | 1267       | P38         | 16177      | CD18    | 16291      | CF5          | 16535      |
| VL_0391   | 1288       | T15         | 16186      | DA00211 | 16301      | P7           | 16542      |
| VL_0104   | 1290       | CD105KSE11  | 16195      | T61     | 16312      | T23          | 16704      |
| L058      | 1298       | T6          | 16197      | P29     | 16343      | P59          | 16815      |
| 106       | 1365       | P30         | 16206      | CD630   | 16354      | E19          | 16857      |
| OX561     | 1725       | CD38        | 16219      | CD22    | 16373      | T11          | 16938      |
| Q24       | 1987       | 70_100_2010 | 16225      | CD8-15  | 16385      | 6503         | 16979      |
| OX1485    | 2071       | CD21        | 16236      | CD42    | 16387      | CD196        | 17041      |
| CD43      | 15808      | CD51        | 16242      | DA00216 | 16408      | NAP08        | 43640      |
| CD113     | 15911      | P49         | 16246      | DA00126 | 16426      | CD105KSO8    | 127182     |

Table S4. CdtLoc of isolates 103, 106 and 133 compared with other Clade 3 strains and a representative strain of each Clade 2 and 5<sup>a</sup>.

| Clade  | Strain        | <i>cdtR</i>              | <i>cdtA</i>       | <i>cdtB</i>       |
|--------|---------------|--------------------------|-------------------|-------------------|
| 3      | ZJCDC-S82     | ID                       | ID                | ID                |
|        | CD69          | 222nt in<br>(37NS+74 in) | 1SNP <sup>b</sup> | 2SNP <sup>c</sup> |
|        |               |                          | (1NS)             | (2NS)             |
|        | VL-0391       | ID                       | 1SNP <sup>b</sup> | 2SNP <sup>c</sup> |
|        |               |                          | (1NS)             | (1NS)             |
|        | VL-0104       | ID                       | 1SNP <sup>b</sup> | 2SNP <sup>c</sup> |
|        |               |                          | (1NS)             | (1NS)             |
|        | L058          | ID                       | 1SNP <sup>b</sup> | ID                |
|        |               |                          | (1NS)             |                   |
|        | OX561         | ID                       | 1SNP <sup>b</sup> | ID                |
| (1NS)  |               |                          |                   |                   |
| OX1232 | ID            | ID                       | ID                |                   |
| OX1485 | ID            | 1SNP <sup>b</sup>        | ID                |                   |
|        |               | (1NS)                    |                   |                   |
| OX2183 | ID            | 1SNP <sup>b</sup>        | ID                |                   |
|        |               | (1NS)                    |                   |                   |
| Q24    | 5SNP<br>(2NS) | 12SNP                    | 25SNP             |                   |
|        |               | (6NS)                    | (10NS)            |                   |
| 2      | CD196         | 8SNP                     | 30SNP             |                   |
|        |               | (9NS)                    | (17NS)            |                   |
| 5      | M120          | 12SNP+36nt in            | 26SNP             |                   |
|        |               | (5NS+12in)               | (12NS)            |                   |
|        |               |                          | 49SNP             |                   |
|        |               |                          | (25NS)            |                   |

<sup>a</sup>The resulted amino acid substitutions and deletions are indicated in parentheses. ID, identical; del, deletion; NS, non-synonymous SNP.

<sup>b</sup>The 1 SNP occurred at the same position (G116A) in *cdtA*.

<sup>c</sup>The 2 SNPs occurred the same positions (C628T and G2,494C) in *cdtB*.

**Figure S1. Schematic representations of the CdtLoc and flanking genes.** The three structures represent complete CdtLoc, incomplete CdtLoc in binary toxin-negative strains and the corresponding region in non-toxigenic strains, respectively. The 5' flanking gene *cd2602* (encoding a sensor histidine kinase), the 3' flanking gene *trpS* (encoding a tRNA ligase), binary toxin genes *cdtA* and *cdtB* and the regulator gene *cdtR* are shown.

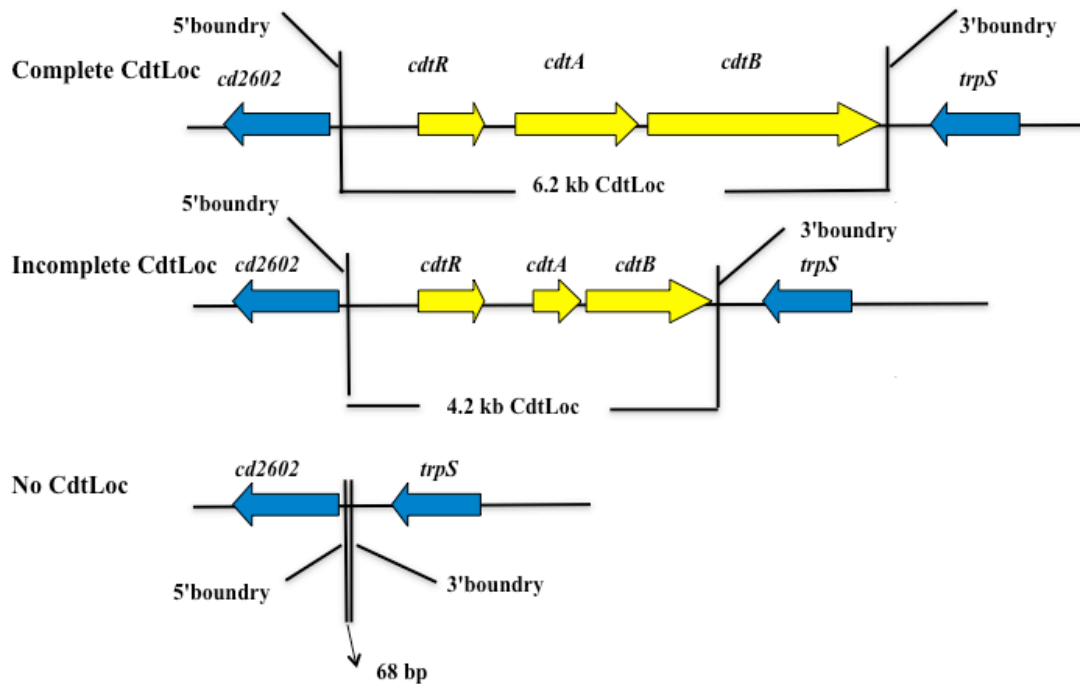

**Figure S2. SNPs among the three isolates. Panel A**, The triangle to show SNP between any two of the three isolates. PCR ribotype, if available, is indicated in parentheses. **Panel B**, A circular plot to show the locations of SNP of isolates 106 and 133 against the core genome of isolate 103.

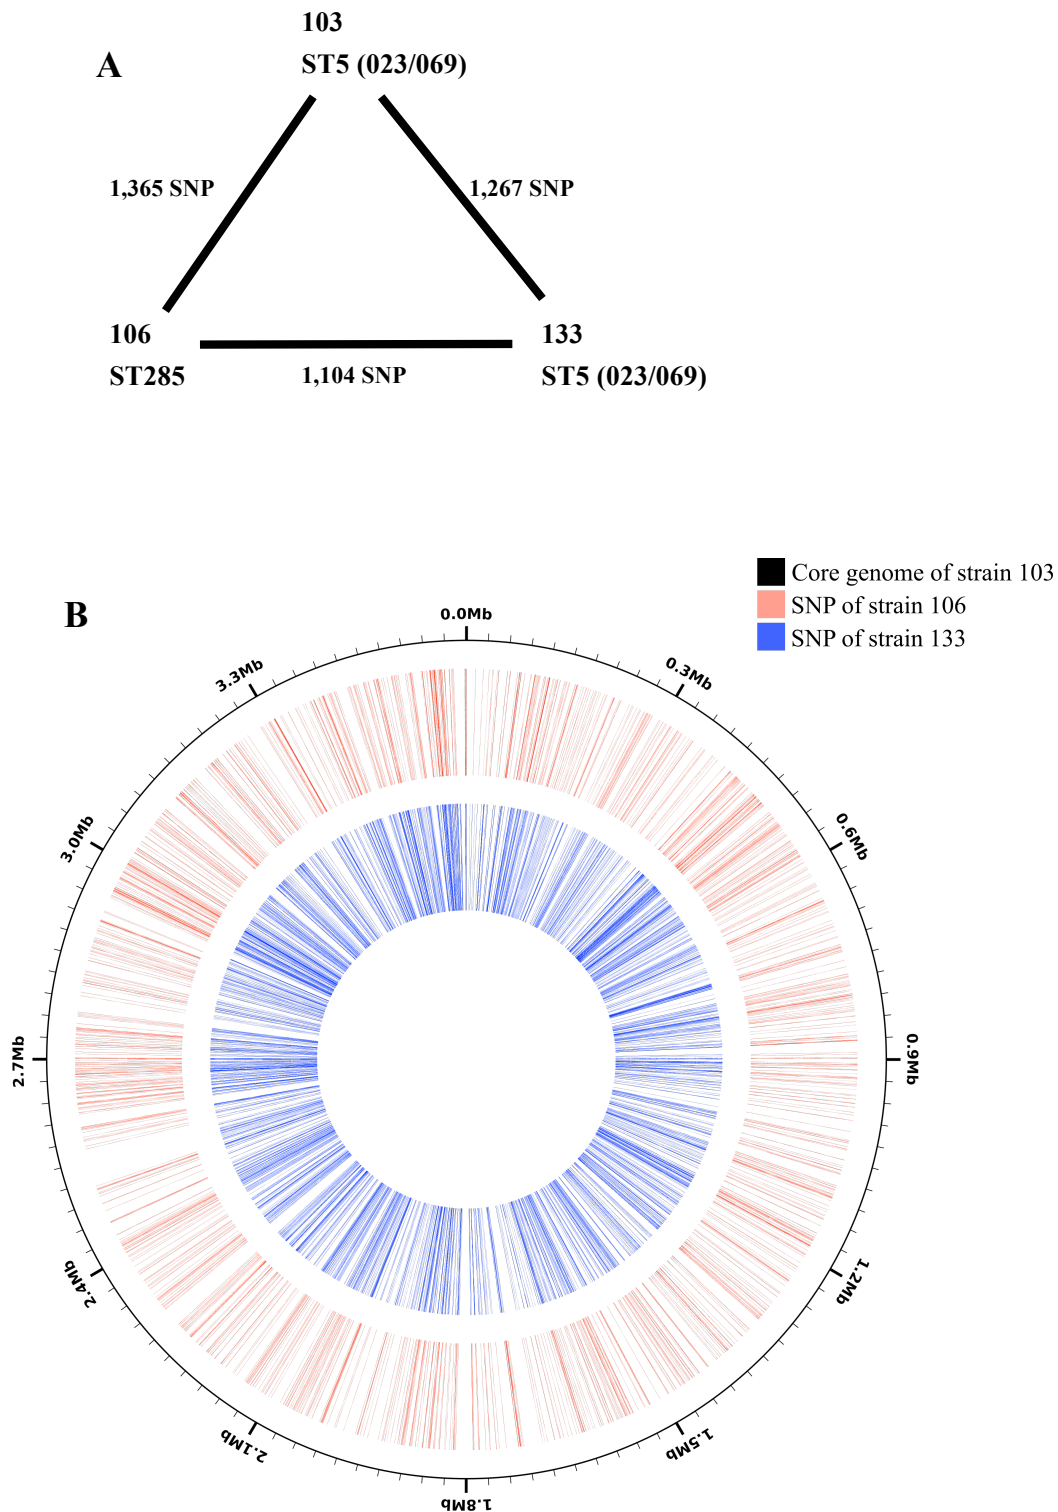



**Figure S3. SNP in *tcdA* and *tcdB* sequences of the three isolates using CD630 as the reference.** The coding regions of both genes have four domains, i.e. glucosyltransferase, autoprotease, delivery and receptor-binding. Red lines represent nonsynonymous SNPs and blue lines represent synonymous SNPs. Panel A, *tcdA*. Panel B, *tcdB*. This figure is followed the style present in the reference<sup>1</sup>.

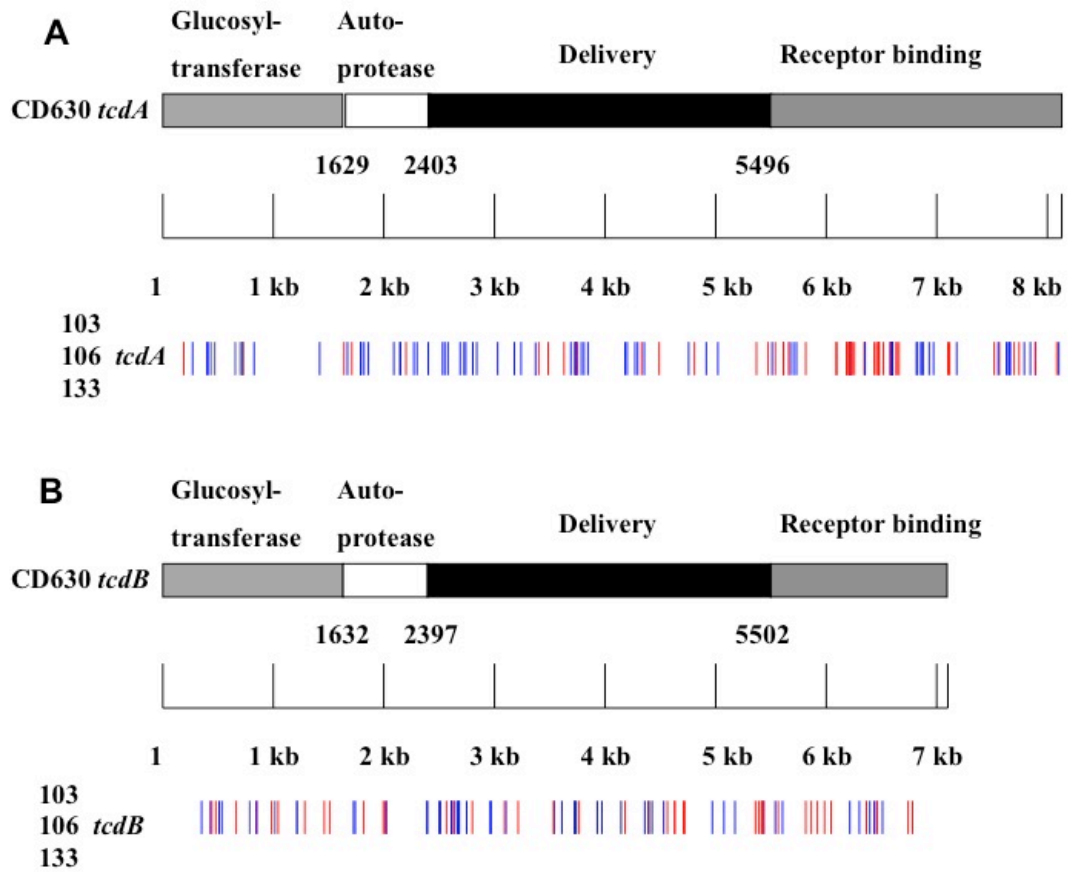

**Figure S4. Phylogenetic tree based on SNPs of CdtLoc of Clade 3 strains and several representative strains of Clade 2 and 5. Bootstrap values >50% (based on 1000 resamplings) are shown. Bar, 0.001 changes per nucleotide position. The nucleotide accession numbers of CdtLoc of these strains are available in Table 1 of the Text in the manuscript.**

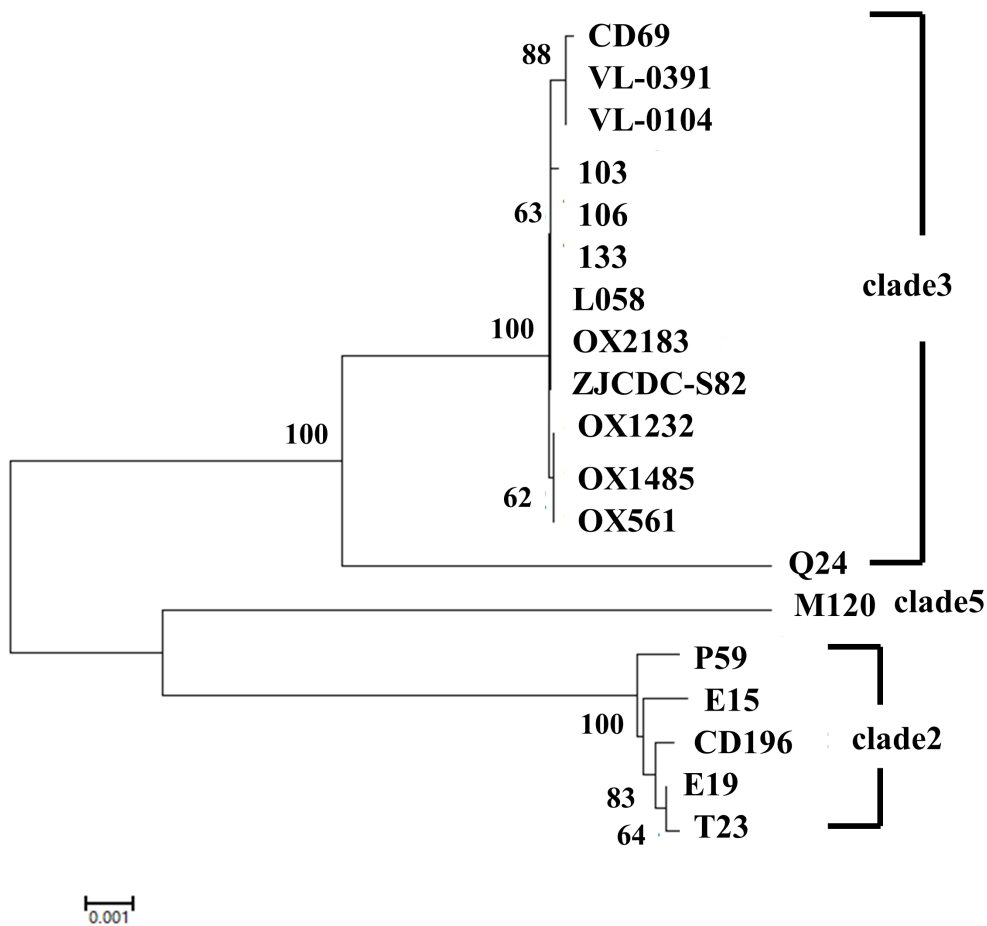

## Reference

- 1 Du, P. *et al.* Sequence variation in *tcdA* and *tcdB* of *Clostridium difficile*: ST37 with truncated *tcdA* is a potential epidemic strain in China. *J Clin Microbiol* **52**, 3264-3270 (2014).
